# Supplementary material for: Analysis of chondroitin sulfate from different sources of cartilage by electrophoretically mediated microanalysis
Source: Royal Society of Chemistry journal article supplement (doi:10.1039/c5ra05576h), 2015-01-01
Supplement: c5ra05576h1.pdf [file c5ra05576h1.pdf]

### Supplementary information

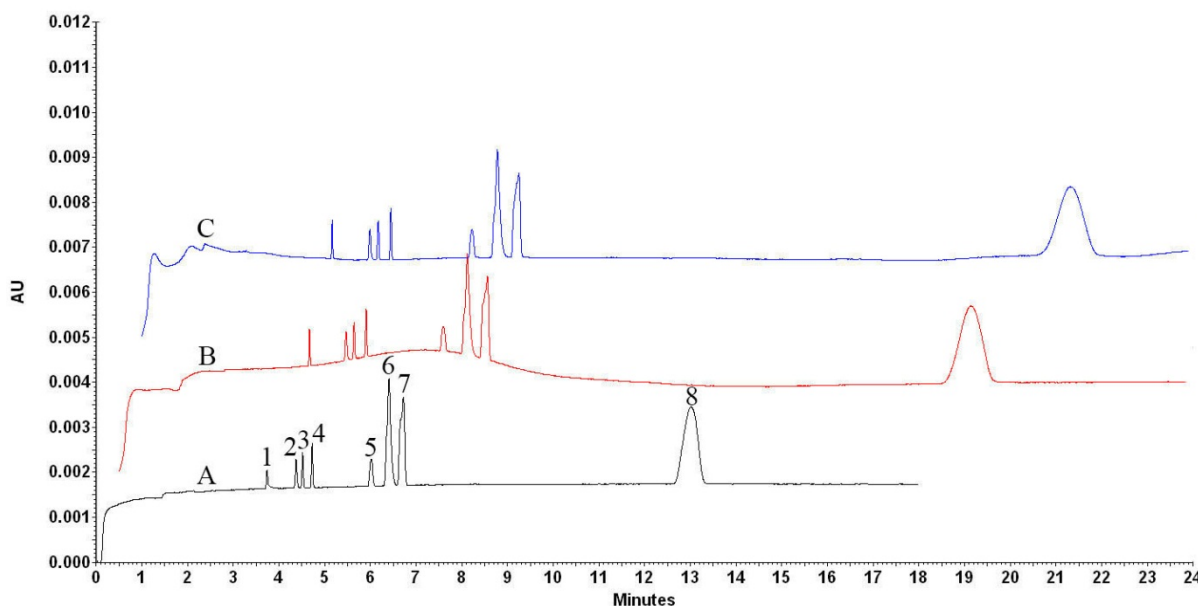

**Fig. 1.** Electropherogram of a standard mixture of chondro-disaccharides. Concentrations:  $\Delta$ Di-triS,  $\Delta$ Di-diS<sub>D</sub>,  $\Delta$ Di-diS<sub>B</sub>,  $\Delta$ Di-diS<sub>E</sub>,  $\Delta$ Di-UA2S: 25  $\mu$ g/mL;  $\Delta$ Di-6S,  $\Delta$ Di-4S,  $\Delta$ Di-0S: 125  $\mu$ g/mL. Fused silica capillary (total length: 60.2 cm, effective length: 50 cm, i.d. 50  $\mu$ m). Capillary temperature: 37  $^{\circ}$ C. Sample temperature: 4  $^{\circ}$ C. Injection: pressure injection at 0.5 psi $\times$ 5s. Detection wavelength: 232 nm. Voltage: -30 kV. Peaks identification: (1)  $\Delta$ Di-triS, (2)  $\Delta$ Di-diS<sub>D</sub>, (3)  $\Delta$ Di-diS<sub>B</sub>, (4)  $\Delta$ Di-diS<sub>E</sub>, (5)  $\Delta$ Di-UA2S, (6)  $\Delta$ Di-6S, (7)  $\Delta$ Di-4S, (8)  $\Delta$ Di-0S. (A) BGE: pH 3.0, 170 mM Tris phosphate buffer. (B) BGE: pH 3.0, 180 mM Tris phosphate buffer. (C) BGE: pH 3.0, 190 mM Tris phosphate buffer.

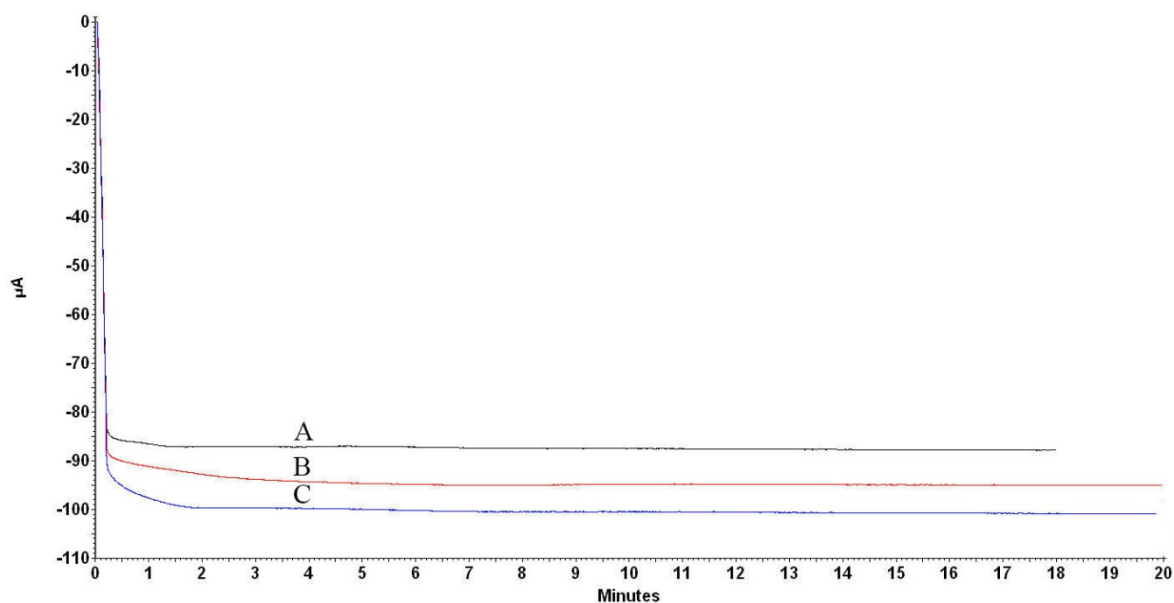

**Fig. 2.** Current of different concentrations of pH 3.0 Tris-phosphate buffer. (A) BGE: pH 3.0, 170 mM Tris phosphate buffer. (B) BGE: pH 3.0, 180 mM Tris phosphate buffer. (C) BGE: pH 3.0, 190 mM Tris phosphate buffer. Other conditions were as in Fig. 1.

Table 1. Precision of the migration time of eight standard disaccharides obtained by CZE separation

| Disaccharides | $\Delta\text{UA} \rightarrow$<br>GalNAc Na | $\Delta\text{UA} \rightarrow$ GalNAc-<br>6SNa <sub>2</sub> | $\Delta\text{UA} \rightarrow$ GalNAc-<br>4SNa <sub>2</sub> | $\Delta\text{UA-2S} \rightarrow$<br>GalNAcNa <sub>2</sub> | $\Delta\text{UA} \rightarrow$ GalNAc-<br>4S,6SNa <sub>3</sub> | $\Delta\text{UA-2S} \rightarrow$<br>GalNAc-6SNa <sub>3</sub> | $\Delta\text{UA-2S} \rightarrow$<br>GalNAc-4SNa <sub>3</sub> | $\Delta\text{UA-2S} \rightarrow$<br>GalNAc-4S-6SNa <sub>4</sub> |
|---------------|--------------------------------------------|------------------------------------------------------------|------------------------------------------------------------|-----------------------------------------------------------|---------------------------------------------------------------|--------------------------------------------------------------|--------------------------------------------------------------|-----------------------------------------------------------------|
| run           | time(min)                                  |                                                            |                                                            |                                                           |                                                               |                                                              |                                                              |                                                                 |
| 1             | 3.625                                      | 4.983                                                      | 5.063                                                      | 5.358                                                     | 7.633                                                         | 8.299                                                        | 8.346                                                        | 14.654                                                          |
| 2             | 3.653                                      | 4.892                                                      | 5.022                                                      | 5.376                                                     | 7.625                                                         | 8.388                                                        | 8.387                                                        | 14.589                                                          |
| 3             | 3.598                                      | 4.876                                                      | 5.123                                                      | 5.283                                                     | 7.592                                                         | 8.243                                                        | 8.291                                                        | 14.572                                                          |
| 4             | 3.623                                      | 4.986                                                      | 5.072                                                      | 5.391                                                     | 7.592                                                         | 8.289                                                        | 8.241                                                        | 14.983                                                          |
| 5             | 3.665                                      | 4.942                                                      | 5.132                                                      | 5.292                                                     | 7.629                                                         | 8.198                                                        | 8.392                                                        | 14.599                                                          |
| 6             | 3.546                                      | 4.835                                                      | 5.092                                                      | 5.322                                                     | 7.594                                                         | 8.32                                                         | 8.462                                                        | 14.982                                                          |
| RSD(%)        | 1.18                                       | 1.24                                                       | 0.80                                                       | 0.84                                                      | 0.26                                                          | 0.79                                                         | 0.94                                                         | 1.34                                                            |

Table 2. Precision of the peak area of eight standard disaccharides obtained by CZE separation

| Disaccharides | $\Delta\text{UA}\rightarrow$<br>GalNAc Na | $\Delta\text{UA}\rightarrow$ GalNAc-<br>6SNa <sub>2</sub> | $\Delta\text{UA}\rightarrow$ GalNAc-<br>4SNa <sub>2</sub> | $\Delta\text{UA-2S}\rightarrow$<br>GalNAcNa <sub>2</sub> | $\Delta\text{UA}\rightarrow$ GalNAc-<br>4S,6SNa <sub>3</sub> | $\Delta\text{UA-2S}\rightarrow$<br>GalNAc-6SNa <sub>3</sub> | $\Delta\text{UA-2S}\rightarrow$<br>GalNAc-4SNa <sub>3</sub> | $\Delta\text{UA-2S}\rightarrow$<br>GalNAc-4S-6SNa <sub>4</sub> |
|---------------|-------------------------------------------|-----------------------------------------------------------|-----------------------------------------------------------|----------------------------------------------------------|--------------------------------------------------------------|-------------------------------------------------------------|-------------------------------------------------------------|----------------------------------------------------------------|
| run           | Peak area                                 |                                                           |                                                           |                                                          |                                                              |                                                             |                                                             |                                                                |
| 1             | 14235                                     | 16190                                                     | 13974                                                     | 3355                                                     | 4594                                                         | 4306                                                        | 3999                                                        | 5601                                                           |
| 2             | 14663                                     | 16439                                                     | 13726                                                     | 3456                                                     | 4478                                                         | 4326                                                        | 3981                                                        | 5682                                                           |
| 3             | 14263                                     | 15973                                                     | 13783                                                     | 3389                                                     | 4526                                                         | 4402                                                        | 3894                                                        | 5702                                                           |
| 4             | 14829                                     | 16783                                                     | 13789                                                     | 3383                                                     | 4520                                                         | 4432                                                        | 3893                                                        | 5593                                                           |
| 5             | 14734                                     | 16538                                                     | 13543                                                     | 3386                                                     | 4493                                                         | 4468                                                        | 3937                                                        | 5671                                                           |
| 6             | 14673                                     | 16583                                                     | 13625                                                     | 3326                                                     | 4423                                                         | 4431                                                        | 3847                                                        | 5704                                                           |
| RSD(%)        | 1.74                                      | 1.78                                                      | 1.09                                                      | 1.28                                                     | 1.26                                                         | 1.47                                                        | 1.48                                                        | 0.88                                                           |

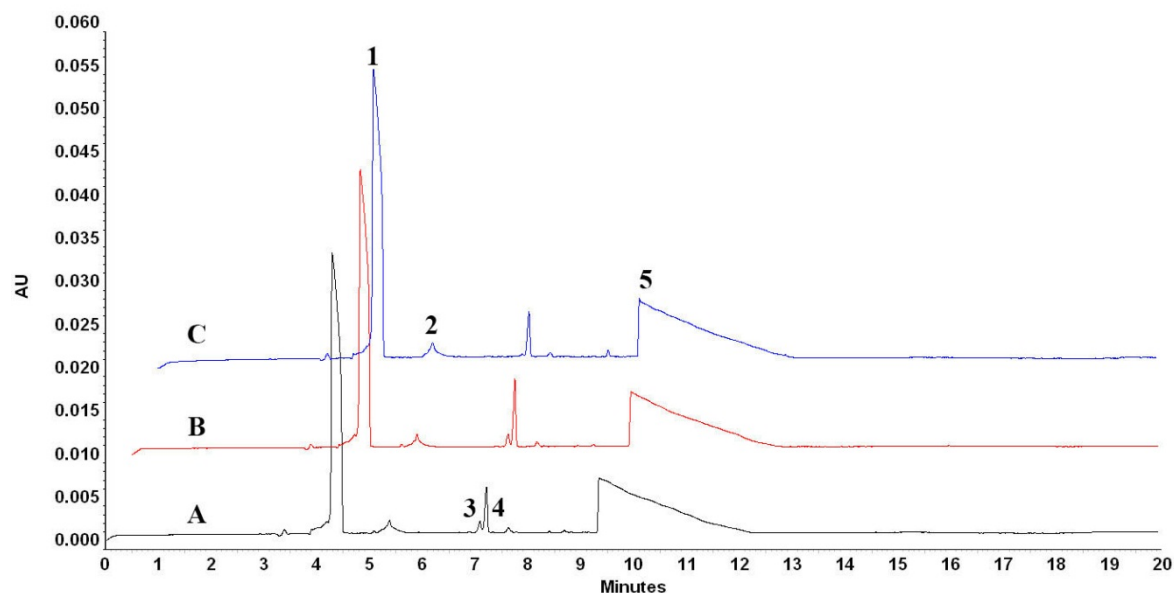

**Fig. 3.** Electrophoretically mediated microanalysis of CS from different sources. (A) cow, (B) pig, (C) shark. Fused silica capillary (total length: 60.2 cm, effective length: 50 cm, i.d. 50  $\mu$ m). Capillary temperature: 37  $^{\circ}$ C. Sample temperature: 4  $^{\circ}$ C. Separation buffer: pH 9.5, 25 mM tetraborate buffer. Incubation buffer: pH 8.0, 50 mM Tris-60 mM acetate buffer (0.5 psi $\times$ 10 s). Voltage: +20 kV. Injection: CS solution (0.5 psi $\times$ 5 s), enzyme solution (0.5 psi $\times$ 5 s). Voltage switch sequence: -1 kV/+1 kV/-1 kV/+1 kV, each for 6 s. In capillary incubation time: 8min. Detection wavelength: 200nm. Peaks identification: (1) solvent peak of incubation buffer, (2) enzyme, (3)  $\Delta$ Di-6S, (4)  $\Delta$ Di-4S, (5) solvent peak of incubation buffer.

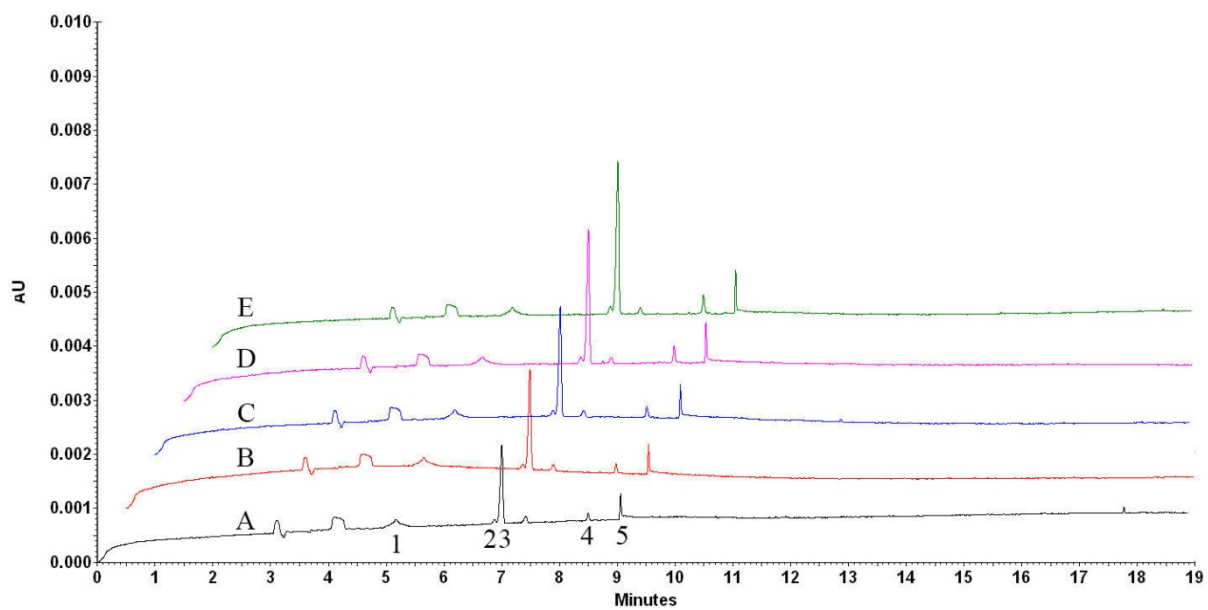

**Fig. 4.** Electrophoretically mediated microanalysis of CS of different concentrations. (A) 300  $\mu\text{g/mL}$ , (B) 400  $\mu\text{g/mL}$ , (C) 500  $\mu\text{g/mL}$ , (D) 600  $\mu\text{g/mL}$ , (E) 700  $\mu\text{g/mL}$ . Detection wavelength: 232nm. Peaks identification: (1) enzyme, (2)  $\Delta\text{Di-6S}$ , (3)  $\Delta\text{Di-4S}$ , (4)  $\Delta\text{Di-UA2S}$ , (5) solvent peak of incubation buffer. Other conditions were as in Fig. 3

Table 3. Precision of the migration time of three disaccharides obtained by EMMA method

| Disaccharides | $\Delta$ UA $\rightarrow$ GalNAc-6SNa <sub>2</sub> | $\Delta$ UA $\rightarrow$ GalNAc-4SNa <sub>2</sub> | $\Delta$ UA $\rightarrow$ GalNAc-4S,6SNa <sub>3</sub> |
|---------------|----------------------------------------------------|----------------------------------------------------|-------------------------------------------------------|
| run           |                                                    | time(min)                                          |                                                       |
| 1             | 7.088                                              | 7.208                                              | 8.683                                                 |
| 2             | 7.134                                              | 7.293                                              | 8.572                                                 |
| 3             | 7.201                                              | 7.196                                              | 8.672                                                 |
| 4             | 6.998                                              | 7.261                                              | 8.695                                                 |
| 5             | 7.042                                              | 7.294                                              | 8.892                                                 |
| 6             | 7.067                                              | 7.277                                              | 8.693                                                 |
| RSD(%)        | 1.01                                               | 0.59                                               | 1.20                                                  |

Table 4. Precision of the peak area of three disaccharides obtained by EMMA method

| Disaccharides | $\Delta$ UA $\rightarrow$ GalNAc-6SNa <sub>2</sub> | $\Delta$ UA $\rightarrow$ GalNAc-4SNa <sub>2</sub> | $\Delta$ UA $\rightarrow$ GalNAc-4S,6SNa <sub>3</sub> |
|---------------|----------------------------------------------------|----------------------------------------------------|-------------------------------------------------------|
| run           |                                                    | peak area                                          |                                                       |
| 1             | 2959                                               | 2890                                               | 97                                                    |
| 2             | 2893                                               | 2886                                               | 98                                                    |
| 3             | 3015                                               | 2796                                               | 101                                                   |
| 4             | 2967                                               | 2885                                               | 99                                                    |
| 5             | 2899                                               | 2936                                               | 96                                                    |
| 6             | 3009                                               | 2894                                               | 97                                                    |
| RSD(%)        | 1.77                                               | 1.59                                               | 1.83                                                  |
